# Supplementary material for: A multidomain connector links the outer membrane and cell wall in phylogenetically deep-branching bacteria
Source: PubMed Central journal article supplement (PMC9388160; doi:10.1073/pnas.2203156119), 2022-08-09
Supplement: pnas.2203156119.sapp.pdf [file pnas.2203156119.sapp.pdf]

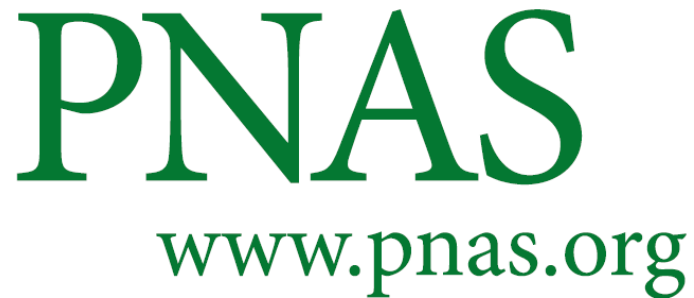

### **Supplementary Information for**

A multi-domain connector links the outer membrane and cell wall in phylogenetically deep-branching bacteria

### **Authors**

Andriko von Kügelgen<sup>1,2</sup>, Sofie van Dorst<sup>2</sup>, Vikram Alva<sup>3,\*</sup> and Tanmay A. M. Bharat<sup>1,2,\*</sup>

### **Affiliations**

1 – Structural Studies Division, MRC Laboratory of Molecular Biology, Francis Crick Avenue, Cambridge CB2 0QH, United Kingdom

2 – Sir William Dunn School of Pathology, University of Oxford, Oxford OX1 3RE, United Kingdom

3 – Department of Protein Evolution, Max Planck Institute for Biology Tübingen, Max-Planck-Ring 5, Tübingen 72076, Germany

\* **Correspondence to** Vikram Alva and Tanmay A.M. Bharat

**Email:** [vikram.alva@tuebingen.mpg.de](mailto:vikram.alva@tuebingen.mpg.de) and [tbharat@mrc-lmb.cam.ac.uk](mailto:tbharat@mrc-lmb.cam.ac.uk)

**This PDF file includes:**

Figures S1 to S8

Tables S1 to S3

Legend for Movie S1

SI References

**Other supplementary materials for this manuscript include the following:**

Movie S1

## Supplementary Figures

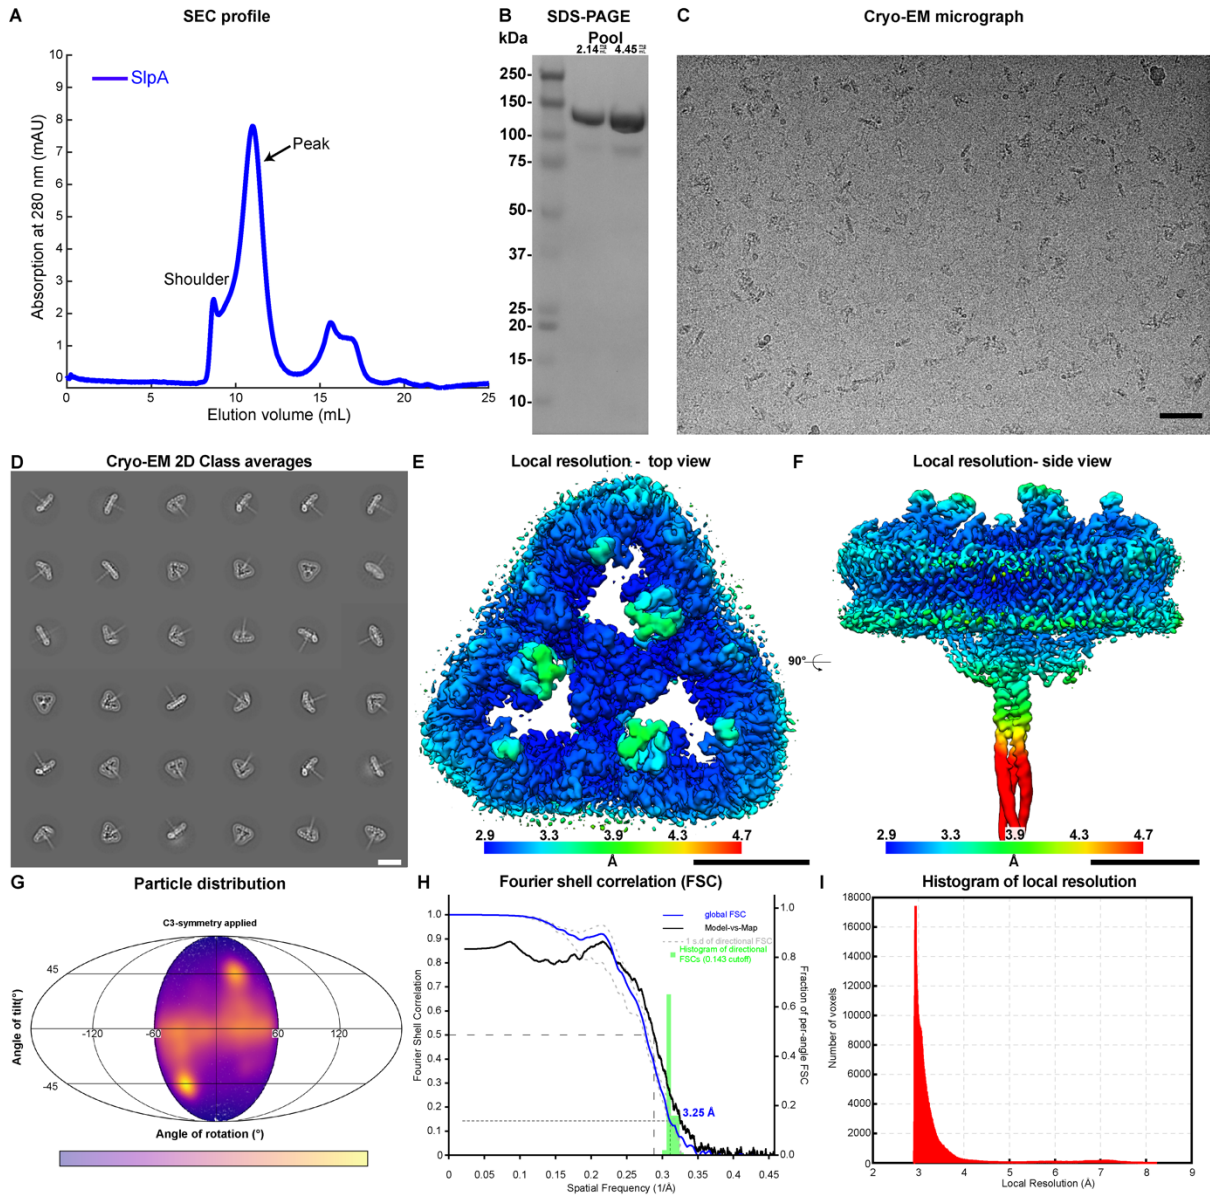

**Figure S1. Cryo-EM structure of the SlpA porin of *D. radiodurans***

(A) Analytical size-exclusion chromatography (SEC) profile and (B) SDS-PAGE analysis of the final purified SlpA protein from the native source. (C) Cryo-EM image of purified SlpA protein flash frozen in liquid ethane (density black). (D) 2D Class averages of SlpA particles picked using TOPAZ (1) and classified inside RELION-3.1 (2) while ignoring CTF-correction until the first peak (density white). (E-F) Local resolution estimated in RELION, plotted into the map, shown in two orthogonal orientations. Resolution of the SlpA OMBB

core is 2.9 Å while the coiled-coil stalk is less well resolved. (G) Angular distribution of the particles in the data set, shown on a relative scale (purple denotes low and yellow denotes high). (H) 3D Fourier shell correlation between two random halves of the data (FSC) (3) and Model vs Map FSC. Histogram binning size is set to 5. (I) Histogram of local resolutions in voxels of the cryo-EM map. Scale bars: C) 500 Å; D) 200 Å; E-F) 50 Å.

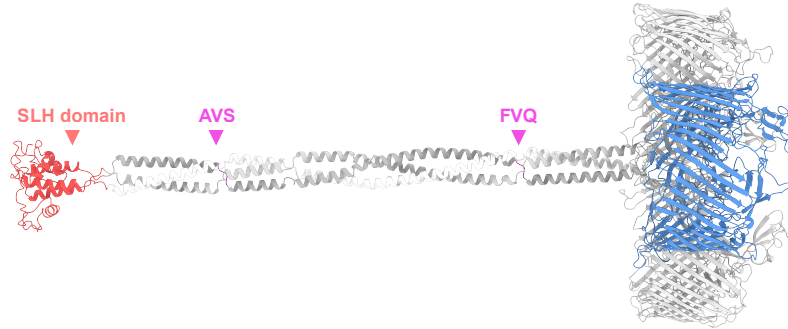

**SlpA - *Deinococcus radiodurans* (UniProtKB ID: Q9RRB6)**

- Signal peptide
- **SLH domain; conserved residues involved in SCWP binding are in boldface**
- Coiled-coil segment; 'a' and 'd' positions of the heptad repeats are highlighted; **β-layer**
- Outer-membrane β-barrel; **insertions are shown in boldface**
- **Additional β-hairpin contained by comparison to orthologs with a 28-stranded β-barrel**
- **Residues involved in metal-ion binding**
- **β-signal motif**

```

MKKSLIALTTALSFGLAAQTAAPVSAP
QVPALTDVPAGHWAKDAIDRLVSRGVILGYPDGTFRGTQNLTRYEAAILIARLLDQMRDGETPAGMTAED
MTALQNA
IQELAAD
LAALGVR
VSDLEANAVSKDD
FARLEAR
IEEVAAAGGEQGA
TEALQGQ
IDDLTAR
VDEYDALRAD
VDDNASS
IAALNDL
TVLLNQD
ILLDQDR
VSAVEAA
QADFVQRSD
FDALGGR
VTTVETR
VETVNNSLTGR
IAALERN
AFSVKPSLTIGYSVSRSTRNFVRLFLPLNADGTVANNAFTSGGIDTDTGAQRDGDFGNASDPVVAGA
AGLYGFADGVSYTVYFTDGSTATFDGLNPADYKVPYTKVIDTTKGRNGFGFNLLARYKLGSTDIGISLGF
DTSGQFSQVTSGTGGSFLSTAGRLQVNQIDLNFGLVTGLPSDAYVITNGNGKIDGSAATGRGTYLGGST
AAILRDPAENVYRPFVFRFKNATTQFSVGNPNVIVTLGQQQKFFYSYVFNIDYDGRGDGFTVTVDGSNV
PVIGAWKPKQIKGVYGSRSGLGTAEAYGVYYRGVRAQITPVGTLTAGIHYAQEGRDMFGAAQNTTSTPS
DVTTYGADLHGKAFGVELHSEYATSRVRPNTANAAVQTSNAFYARVATRKDNLAFDLNTPAAKFGNDTFG
VSLYDLNRYKIDAGYNNVAGISEYGYGSYSRTSAQNIAYNPDTVETAPFANLDRQAYTANNGSERN
DGTVVATNTKIQMGFGVKAANLGPVAIGGYDSTGANGDNANRMTEAGGSAKVAYSIFSLRGTYNTL
DSNRPQIYRDAAGTQIIGDAKVRRYAVQADVTPGLGLFVGVAYYRDVNVNGVRSSTDRGLLGRGYLASSFE
PGVGNNAVRTGLRCADNNFGTGRDIDGVGVLNPAVNLDSRTATCFTSYGVEAGHAGDNANALVKDLF
FRVGYSRVYVPTTATATTGDFSGSVTYGDARYDRKVGVANVRLAGSFSTTNTQLDSRPAGTRGAVGLIVR
TDPLENVFPRQFNGQVGYYTADNRVAAGNYNANATKYGAGVVLNDFLLPQTKIGVRYDGYMAQNRQYTP
FDGDGTQGYFSDANNRRRTNLNGVYVEGAYQDLIFSYGTYTLSQKDLNGVEYGGGINNQPARGQTFKIS
YKVN

```

**Figure S2. Sequence annotation of the *D. radiodurans* SlpA protein.**

A full structural model of *D. radiodurans* SlpA obtained by combining the cryo-EM and AlphaFold-Multimer v2.2.0 prediction is shown in cartoon representation; the two  $\beta$ -layers are colored in magenta (upper). The boundaries of the SLH domain, the coiled-coil segment, and the OMBB as well all other sequence features, as detailed in the rectangular box, are marked in the sequence of SlpA (lower).

**β1**

*D. radiodurans* (30) AFSVKPSLTIGYVSVRTS---RNFVDRLFLPLNADGTVANNAFTSGGI-----D'TDTGA--QRRDFGDFGNASDPVAVAGAAGLYGFADGVSYTYVFTD  
*D. wulumuqiensis* (30) AFSVKPSLTIGYVSVRTN---RNFVDRLFLPLNADGTVANNAFTSGGI-----DSDTGA--QRRDFGDFGNASDAVAVAGEAGLYGFADGVSYTYVFTD  
*D. wulumuqiensis* (30) AFSVKPSLTIGYVSVRTN---RNFVDRLFLPLNADGTVANNAFTSGGI-----DADSGR--QRRDLGDFGNSSAVVAGEGGLYGFAAAAPG-----  
*O. desulfurans* (30) QFTVSGSISGEYVFRVLDGGLEDFDADRLFAT-----SFSTGEA-----T'DTKGDVAAKELDLPGPF-----EGGLYGFADGVSYTYVFTD  
*M. ruber* (28) RPTLTGSLSATYGYSTN-TG--GDFDLDRFLPGN-----ALSSGTGDDVSGNIRNA-FRRGDF-----  
*T. thermophilus* (28) RYSISGSLSATYGVTVDTG--TNFDIDRLFLPGN-----AFSTGTY-----GSFSSS-VQAGDS-----

**β2** **β3**

*D. radiodurans* (30) **GSTATFDGLNPADYKVPVKVIDT'TKGRNGGFNNLARYKEGSDTIGISLGFDTSGQFSQVTS'GTTGGSLFSTAGRLQVNQIDLNFLGLV'TGLPSDAYVDTN**  
*D. wulumuqiensis* (30) **GTTATYNGLNTAGYATPDGKTVDRTKGTNGFAFNNLARYKEGSDTIGISLGFDTSGQFSQVTS'GTTGGSLFSTAGRLQVNQIDLNFLGLV'TGLPSDAYIDTN**  
*D. wulumuqiensis* (30) -----AKYQEGSTNIGISLGFDTSGQFSQVTS'GTTGGSLFSTAGRLQVNQIDLNFLGLV'TGLPSDAYIDTN  
*O. desulfurans* (30) -----QQEGTWSSSLTKLKLFPNAYK-----VDAAGLTKIGIEIDGTWVSGGSGYTG-----  
*M. ruber* (28) -----NQ-T'YTYGGASLNFLGKPT-----GGAISEVSLGLSADLVN-----  
*T. thermophilus* (28) -----NQNIISGGSASLTFGVKVAQPGTSG-----VNVSEASATLQVPAFAFTA-----

**β4** **β5** **β6**

*D. radiodurans* (30) **GNGKKDDGEATGRGTYL'GSSGTAALRDPAGN'VYRPVFRFKNAT'QFSVGNPNPVI'VTLGQ-QQK'FYSDYVFDNNYDGR**---GDGFTV'TVDGSNVPVI  
*D. wulumuqiensis* (30) **GNGKKDDGEATGRGTYL'GSSGTAALRDPAGN'VYRPVFRFKNAT'QFSVGNPNPVI'VTLGQ-QQK'FYSDYVFDNNYDGR**---GDGFTV'TVDGSNVPVI  
*D. wulumuqiensis* (30) **GNGEQDAGEATGRGTYL'GSSGTAALRDSAGNIYRPVFRFKNAT'QFSVGNPNPVI'VTLGQ-QQK'FYSDYVFDNNYDGR**---GDGFTV'TVDGSNVPVI  
*O. desulfurans* (30) -----TGGFWVDVSVR'FTSVGNLPLMITLAR-QPKA'HFTYEVFDNNYDGR---GTGYVVEYKGI-----  
*M. ruber* (28) -----SGVARTLALNSASVKGSLSGQAFSVTYNDDST'FSFNPLYFNNSTVGD-LITTRGFVATLDKAFPL-----  
*T. thermophilus* (28) -----YTSAPTIRLNAASVKGNVDGQAFSVVYSRVSSFKFNDYLFANNDSEPANPRQGMVATFSATKFFL-----

**β7** **β8** **β9** **β10** **β11**

*D. radiodurans* (30) **GAWKQP'IKGVYGSRSGLDG-TAEAGY**---VYR'GVRAQIT'PVGTLTAGIHYAQEGRDMFGAAQNTTSTPSDVTY'GADLHGK-AFGV'ELHSEYATSRVR  
*D. wulumuqiensis* (30) **GAWKQP'IKGVYGSRSGLDG-TAEAGY**---VYR'GVRAQIT'PVGTLTAGIHYAQEGRDLFGAAQNTTSTPSDVTY'GADLHGK-AFGV'ELHSEYATSRVR  
*D. wulumuqiensis* (30) **GAWKQP'IKGVYGSRSGLDG-TAEAGY**---VYR'GVRAQIT'PVGTLTAGIHYAQEGRDLFGAAQNTTSTPSDVTY'GADLHGK-AFGV'ELHSEYATSRVR  
*O. desulfurans* (30) -----LDIT'GVYGSTG---DADTVNGDN---RYR'GVMAKGSFEN-FSIAAYAVQEAADV'YGP-----AYSNTVYGGHATAS-FG'PLSLEGEYDMSNNG  
*M. ruber* (28) ---SPKFTV'VAGEGIDDTAI'PAASRVWGTDPT'YGLRAELNLLG-IT'TGLS'YAEN-----RGNRS'AFGVYKGSFLGLVNL'EGAFVAST'PF  
*T. thermophilus* (28) ---APEVTV'VAGVAGPADKDTA'PALN---GNYF'IGRTAVKPF'FALNLA'LNAYTN-----LGNRS'AI'GVDDGLE-LGPA'KLSGLV'WSSQTP

**β12** **β13**

*D. radiodurans* (30) **PNTAN---**AAVQTS'NAFYARVAT'RKDNLAFD'LNTPAK'FGNDT-FGV'SLYDLN'YRKIDAGY'NNVAGI'SEYGYGSY'RSRTSAQNI'AYNPD'TGVTAP'FANLDR  
*D. wulumuqiensis* (30) **PNTAN---**ATVQTS'NAFYARVAT'RKDNLAFD'LNTPAK'IGNDT-FGVALY'DLN'YRKIDAGY'NVAGI'SEYGYGSY'RSRTSAQNI'AYNPD'TGVTAP'FANLDR  
*D. wulumuqiensis* (30) **PNTAN---**AAVQTS'NAFYARVAT'RKDNLAFD'LNTPAK'IGNDT-FGVALY'DLN'YRKIDAGY'NNVAGI'SEYGYGSY'RSRTSAQNI'AYNPD'TGVTAP'FANLDR  
*O. desulfurans* (30) **T-----**PASVMY'FKGLNL-----GDG'KFANAN'YRAIDP'DFAGV'SQD-----VDT  
*M. ruber* (28) **GF'PV-DFS**NQLVTDQAFYTKLGVKL-----GI'ELNAN'YRAIDP'QYNNQAGL'SSASS'YYYFGLGGNEA'PYGA-----  
*T. thermophilus* (28) **GS'PFAD'**FDN'TLSDW'YYYAQAEAKL-----G'PLSLSAN'YHAVD'PQYADGQAGM'SENEDT'YYG-GEKAG'A'PYGA-----

**β14** **β15** **β16** **β17**

*D. radiodurans* (30) **QAYTDANND---**GTSDRNADGT'VVATNTKI'QMG'FGVKA'ANL---GPV'AI'GGYYD'TSTGANG'DNANR'**MTEAGGS'AKVAYS'IFSLRGT'YNTLDS**NRPQI  
*D. wulumuqiensis* (30) **QAYTDANND---**GTSDRNADGT'VVATNTKI'QMG'FGVKA'ANL---GPV'AI'GGYYD'TSTGANG'DNANR'**MTEAGGS'AKVAYS'IFSLRGT'YNTLDS**NRPQI  
*D. wulumuqiensis* (30) **QAYTDANND---**GTSDRNADGT'VVATNTKI'QMG'FGVKA'ANL---GPV'AI'GGYYD'TSTGANG'DNANR'**MTEAGGS'AKVAYS'IFSLRGT'YNTLDS**NRPQI  
*O. desulfurans* (30) **AGYQSEDS**SGNTINGAPFGD-----DQK'GYG'DAAE'L---GAF'VSVGY'DHQ'TDFAGT'ATSQVD'KYGA'AAEAKLSVIT'LK'GNYDY'YNA-----  
*M. ruber* (28) -----NNG'FGLDGK'LTL'PLGGIEVR'GFYD'NSAD'FATGAQ-----  
*T. thermophilus* (28) -----DTRGL'GVSASV'GF---GPV'TL'KGYAESEGDY'NLAPG-----

**β18** **β19**

*D. radiodurans* (30) **YRDAAGTQ'IIDDAQVRRYAVQADVT'PGLGL'FVGAYR'DVNVNGVR'STDRGLL'GRGYLASS'FEPGVGNNA'YRTGLRCADNN'FGTGRDID'GVGGV'LNPAV**  
*D. wulumuqiensis* (30) **YRDAAGTQ'IIDDAQVRRYAVQADVT'PGLGL'FVGAYR'DVNVNGVR'STDRGLL'GRGYLASS'FEPGVGNNA'YRTGLRCADNN'FGTGRDID'GVGGV'LNPAV**  
*D. wulumuqiensis* (30) **YRDAAGTQ'IIDDAQVRRYAVQADVT'PGLGL'FVGAYR'DVNVNGVR'STDRGLL'GRGYLASS'FEPGVGNNA'YRTGLRCADNN'FGTGRDID'GVGGV'LNPAV**  
*O. desulfurans* (30) -----DATD'PTNDEV'TYGGSA'I'GPKMGT'LEAFYS'LATL'GGA-----AVDG  
*M. ruber* (28) -----TADT'FSVGA'TI'PLFAG'FLSN'LPFNN'TNVN'GQAQV'SGATGGQ'SGLN'GNY-----NY  
*T. thermophilus* (28) -----SVND'AWGVAATL'GSFRG'FSLT'GFYNA'AYTGGNG'YFSLT'TAVDAI'APG-----VT

**β20** **β21** **β22** **β23**

*D. radiodurans* (30) **NLDQSR'TATCF'TSYGVEAGHAGD'NANALVKD'LFFRV'GYSRVYVPTTATAT'TGDFSGS'VYGDARYDR'KVGANV'RLAGS'FSTTNTQ'LDSDRP--AGTRGAV**  
*D. wulumuqiensis* (30) **NLDQSR'TATCF'TSYGVEAGHAGD'NANALVKD'LFFRV'GYSRVYVPTTATAT'TGDFSGS'VYGDARYDR'KVGANV'RLAGS'FSTTNTQ'LDSDRP--AGTRGAV**  
*D. wulumuqiensis* (30) **NLDQSR'TATCF'TSYGVEAGHAGD'NANALVKD'LFFRV'GYSRVYVPTTATAT'TGDFSGS'VYGDARYDR'KVGANV'RLAGS'FSTTNTQ'LDSDRP--AGTRGAV**  
*O. desulfurans* (30) **PLPT---**TEGESAYGASL'SHDGAS'ENALISGL'NLTA'KYATV'VS-----GNTD'IQV'YGD--FD'AKF'GVVGI'HFM'P'RYHMPN'P-----GDTT'I'KY  
*M. ruber* (28) **YLYNNQ'DARWS'SGFGV'KLIIHNGRAS'NALIP'NLIDN'LWYQ'SFAGPN-----ACNDV'LAS'VG--YNA'KLGFIS'FNPIL'RYHSF'SAAAP'APG'NRSTN'ALY**  
*T. thermophilus* (28) **YYYTIENQ'KYSSW'GVRVAH'DGKAEDALI'PTLN'LTAQYATYV'VS-----GHTD'IQVYADLAK'PFKLA'ILSLS'PGF'RYHSF'AGAGS'AP--TYTTL'KG**

**β24** **β25** **β26** **β27**

*D. radiodurans* (30) **GLIVRTD'PLENV'PFRPQ'FNGQV'GYTADNRVAAGN--Y'NANAT'KYGAGV'LVNDFLLPQTKI'GVRYDGYMAQ'NRQYT-----PFDGSGT'QGYFSD-----**  
*D. wulumuqiensis* (30) **GLIVRTD'PLENV'PFRPQ'FNGQV'GYTADNRVAAGN--Y'NANAT'KYGAGV'LVNDFLLPQTKI'GVRYDGYMAQ'NRQYT-----PFDGSGT'QGYFSD-----**  
*D. wulumuqiensis* (30) **GLIVRTD'PLENV'PFRPQ'FNGQV'GYTADNRVAAGN--Y'NANAT'KYGAGV'LVNDFLLPQTKI'GVRYDGYMAQ'NRQYT-----PFDGSGT'QGYFSD-----**  
*O. desulfurans* (30) **GAQK'V'GEL-GV'VFKPTLM'GDFVSR'TTG-----TTSEM'KYGV'LEL'GDFV'FG-S'LLKGY'ASYTAANVASV-----LLADQ'LLDP'FPAD'RWV**  
*M. ruber* (28) **GIGVTTD'QL-GIFL'KPSLEGA'FVQ'QSI'TETAP'GSN---S'SSEQ'WVR'GLN'NEFLAT'G'VSFV'KVYAR'YSATNV'VSP'NVG'PAG'PARG'F'G'FNPLS'L'TDR'VF**  
*T. thermophilus* (28) **GVQVST'DPL---L'FLGLS'DGAVS'YRRTQYT'NNS'FN--V'TTY'EL'YRAGV'KLQ'DFLAP'KLN'FSVA'YAH'EGD'QLAGT---GLP'V'VSGN'QAFN'FARD'RVY**

**β28** **β29** **β30**

*D. radiodurans* (30) -----ANNRR'TNLNGVY'VEGAYQD'LIFS'GYT'YLSQKDL-NGVEY'GSGIN'NQPPAR'GQTE'**KISYKVN**F  
*D. wulumuqiensis* (30) -----SNNRR'TNLNGVY'VEGAYQD'LIFS'GYT'YLSQKDMTSGTEY'GSGIG'NQPPAR'GQTE'**KISYKVN**F  
*D. wulumuqiensis* (30) -----SNNRR'TNLNGVY'VEGAYQD'LIFS'GYT'YLSQKDM-AGTEY'GSGLN'DGKAAR'GQTE'**KISYKVN**F  
*O. desulfurans* (30) **SS-----**TGTTNGSL'TGYF'FEWTEY'GMQFAYIDAV'VNN-----GGNT'HGQ'AFK'VSYSV'EF  
*M. ruber* (28) **NYPGEV'QFPWNL'TDFGT'NSG'SVTGLY'LEWKYGNL'TMAAASATLADG-----SGATV'SNGS'GQKISY'VEF**  
*T. thermophilus* (28) **RSPDI'IA'PWLA--TPGTQ'AGKLD'GFYIEAKYD'LTVAYGE'FVLDDL-----NGTN'P'NFGR'GPKISY'TV'KF**

**Figure S3. Multiple sequence alignment of the OMBB region of representative SlpA proteins.**

Residues part of  $\beta$ -strands are underlined in the sequence of *D. radiodurans*. Large insertions in *D. radiodurans* OMBB are shown in boldface, the extra  $\beta$ -hairpin is colored red, and the  $\beta$ -signal motif (BAM insertion signal) is colored green. The number of  $\beta$ -strands contained in the individual OMBBs are indicated with rounded brackets. Accession details for the shown sequences are provided in Table S2.



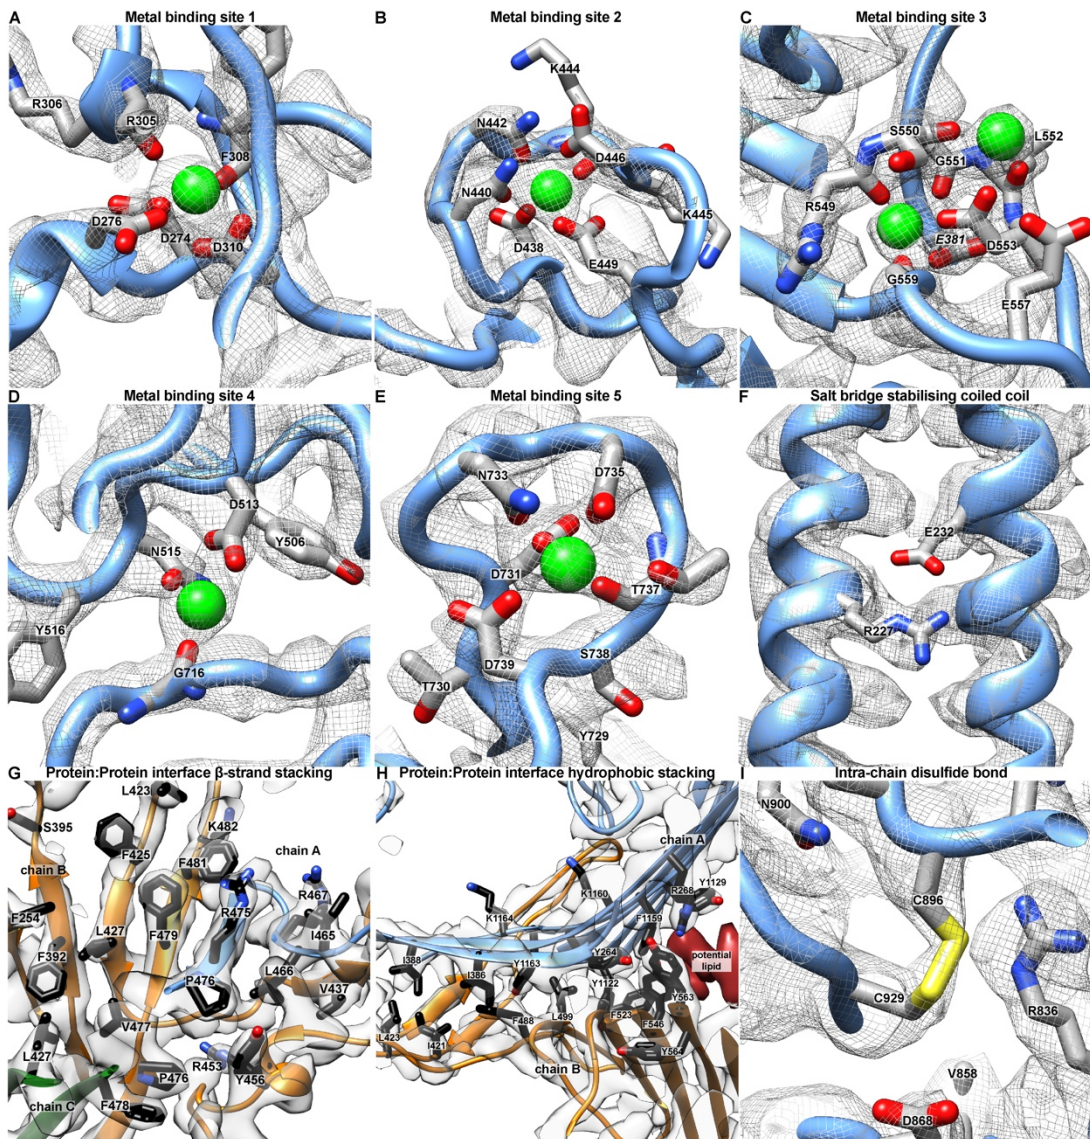

**Figure S4. Close-up views of the SlpA OMBB model.**

(A-E) Close up views of putative metal ion (green) binding sites in SlpA, depicted as ribbon and stick diagram. In all metal binding sites, putative metal ions are coordinated by carboxyl group of aspartate and glutamate residues as well as the carbonyl oxygen of asparagine side chains or the main chain peptide bond. While there is clear density for the metal ion, the chemical identity of the metal cannot be ascertained. (F) A prominent salt bridge between the E232 and R227 of a second SlpA subunit stabilizes the coiled-coil region. (G) Close to the central symmetry axis the trimeric conformation is stabilized by

hydrogen bonding via  $\beta$ -strand stacking. (H) The  $\beta$ -sheets of two opposing outer membrane barrels are stabilized through hydrophobic stacking (see also Figure 2C,D). Additional density at the interface could correspond to lipid molecules, however we cannot assign this unambiguously (marked in mud-colored density). (I) The primary sequence of SlpA contains two cysteine (896, 929) residues which form an intra-chain disulfide bond within the plug of the OMBB (resolved). In panels A-F) and I) cryo-EM density is shown as grey mesh, while in panels G-H), density is shown as an isosurface for clarity.

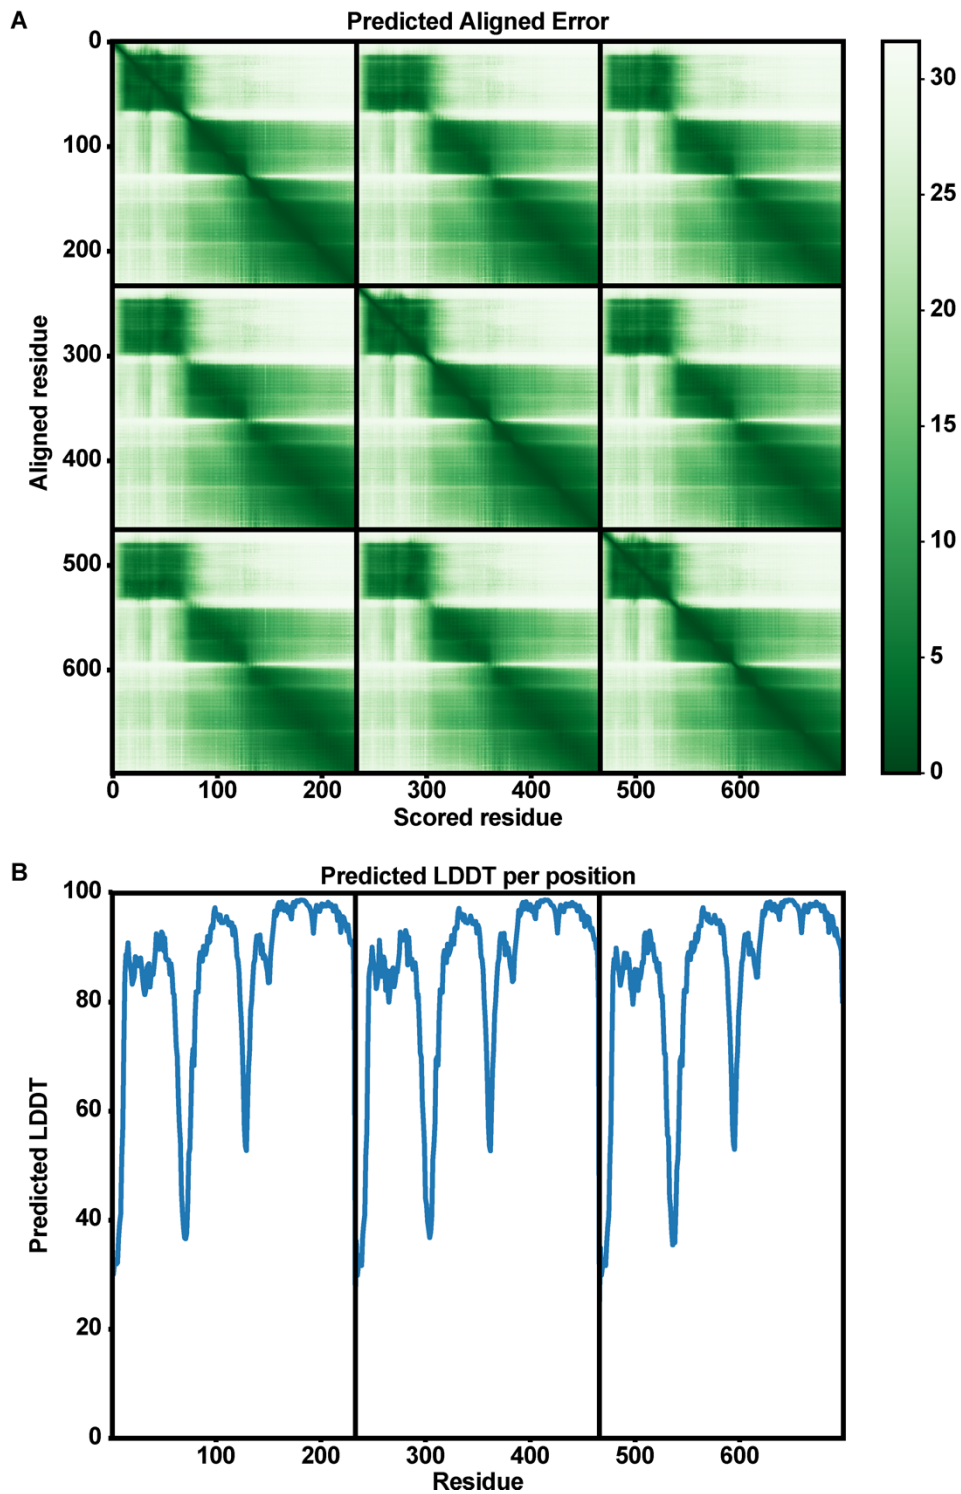

**Figure S5. AlphaFold modelling of the SlpA periplasmic segment.**

The homotrimeric periplasmic part of SlpA was modelled using AlphaFold-Multimer v2.2.0.

The Predicted Aligned Error (PAE, upper) and per-residue confidence (pLDDT, lower)

plots for the model with the best confidence is shown. Low PAE and high pLDDT values are indicators for high accuracy of the model yielded by AlphaFold-Multimer v2.2.0. The subplots in each panel correspond to one SlpA monomer.

```

D. radiodurans [99] MTALQNAIQELAADLAALGVRVSDLEANAVSKDDFARLEARIEEVAAA-----GGEQQGATEALQGGQIDDL
D. wulumuqiensis [99] MTALQNAIQELAADLAALGVRVSDLEANAVSKDDFARLEARIEEVAAA-----GGEQQASEDIQGGQIDEL
D. wulumuqiensis [99] MTALQNAIQELAADLAALGVRVSDLEANAVSKDDFARLEARIEEVAAA-----GGEQQASEDIQGGQIDEL
D. ficus [101] LTALQNAVQELAADLAALGVRVTDLEENMVSKEDFARLEERVNALGAV-----EGDPTALQGITDQLAAL
D. chartae [102] VTTLRNAVQELAADLAALGVRVADLEDNAVTKDDFARLEEQVNTLAGAT---GSDEPEALKELTDQLEAA
M. hydrothermalis [90] LTALRNAVQELAAELSSLGVRRVGALEDNAATKDDVARLEAAINELRAQPVPEPPGVDEKALRELAERVEAA
O. desulfurans [89] ITALRNAVQELAAELASLGVRVSALEDNAASKSDVARLEKMTAELKGMPSGE-GASGALKDLADRVEAA
M. ruber [96] MTAIRNAVQELAAELASLGVRVSALEDNAASKDDIARLEAAIEALKAAPAPAPGMDEAALADLADRVEAA
T. thermophilus [98] LEALKNAVQELAAELASLGVRVSALEDSAATKEDIARLEAMIELKAQPMPEPGMDQALKDLMDRVEAA
T. thermophilus [98] -----LEAMIAELKAQPMPEPGMDQALKDLMDRVEAA

D. radiodurans [164] TARVD-----EYDALRADVDDNASSIAALNDLTVLLNQDILDLQDRVSAV
D. wulumuqiensis [164] TARVD-----EYDALRADVDDNASSIAALNDLTVLLNQDILDLQDRVSAV
D. wulumuqiensis [164] TARVD-----EYDALRADVDDNASSIAALNDLTVLLNQDILDLQDRVSAV
D. ficus [166] NTSVDELTA-----NYDTLRADVDDNASNIAALNDLTVLLNQDILDLQDRVSAV
D. chartae [168] SIAADTALQATELQDK-----FEALDGRVSELAAEVEANAASIAALNDLTVLLNQDILDLQDRVTAL
M. hydrothermalis [160] SIAADTALQAQQLNEQ-----LGAVEGDLAALRSLVEANADSIKALNDLAVLLNQDVLELQDRVTAL
O. desulfurans [158] AIAADTALAQ-----VQALEGKVDAVGAQASANADSIKALNELAVLLNQDVLSLQDRVTAL
M. ruber [166] SVAADTALQAQVLAER-----LDGIEGDVAALKTQVEADADSIRALNELAVLLNQDVLSLQDRVTAL
T. thermophilus [168] SIAADTALQAQQLAERLDALAQDVEGVKGDLAGLRSQVEANDAIQALNELAVLLNQDVLSLQDRVTAL
T. thermophilus [131] SIAADTALQAQQLAERLDALAQDVEGVKGDLAGLRSQVEANDAIQALNELAVLLNQDVLSLQDRVTAL

D. radiodurans [209] EAA-----QADFVQRSDFDALGGRVTTVETRVETVNNSLTGRIAALERN
D. wulumuqiensis [209] EAA-----QADFVQRSDFDALGGRVTTVETRVETVNNTLSGRIAALERN
D. wulumuqiensis [209] EAA-----QADFVQRSDFDALGGRVTTVETRVETVNNTLSGRIAALERN
D. ficus [215] EAA-----QSDFVLRADFDNLTRVAGIDTRVNLEKA-----
D. chartae [231] ETE-----GVTPDDLEALREFSTLTRRDLTALTDRVEGIDTRVAALESA-----
M. hydrothermalis [223] EKVGQ----PDVSGLASQDVAVQEEFATALRNDLVNLSNRVSALDTQVADIDER----LQTVEAN
O. desulfurans [214] EKASGM---TDLSGVATKDDVQSVRDYVTAIRGDLVNSNKVSALEANVGDLQDQ---VNLKFEY
M. ruber [229] EKQLGD---VDFESFANREDVSAIQEFATALRSDLVRLSDRVSALDTRVGALDQR---LAAVEAT
T. thermophilus [238] EKMVSGGQELPDLEQFATKEDVAAVQEFAAALRSDLVGLSDKVSKLEEQVAELNKV-----
T. thermophilus [201] EKMVSGGQELPDLEQFATKEDVAAVQEFAAALRSDLVGLSEKVSKLEGTVGDLSGK---VAILQRN

```

**Figure S6. Multiple sequence alignment of the coiled-coil region of representative SlpA proteins.**

The core-forming hydrophobic positions ('a' and 'd' positions of the heptad repeats in canonical coiled coils) are shown in boldface in each sequence. Residues involved in forming  $\beta$ -layers are coloured red. Accession details for the shown sequences are provided in Table S2.

**A**

**Multiple sequence alignment of SLH domains from SlpA-like proteins**

|                                         |      |                                                                |
|-----------------------------------------|------|----------------------------------------------------------------|
| <b>slpA</b>                             |      |                                                                |
| <i>Deinococcus radiodurans</i>          | [32] | ALTDVPAGHWAKDAIDRLVSR-GVILGYPDGTFRGTQNLTRYEAII IARLLDQMRDGET   |
| <i>Deinococcus wulumuqiensis</i>        | [32] | ALTDVPAGHWAKDAIDRLVSR-GIILGYPDGTFRGTQNLTRYEAII IARLLDQMRDGET   |
| <i>Deinococcus wulumuqiensis</i>        | [32] | ALTDVPAGHWAKDAIDRLVSR-GIILGYPDGTFRGTQNLTRYEAII IARLLDQMRDGET   |
| <i>Deinococcus ficus</i>                | [33] | ALTDVPAGHWAKDAIDRLVSR-GIILGYPDGTFRGTQNLTRYEAII IARLLDQMRDGET   |
| <i>Deinobacterium chartae</i>           | [37] | ALSDVPAGHWAKDAVDQLVAK-GIITGFDPGTFRGNELTRYQAALI IARVLEQVAAGSV   |
| <i>Marinithermus hydrothermalis</i>     | [24] | QFSDVPAGHWAKEAVEKLADE-GIILGFDPGTFRGNELTRYQAALI IFRVLETIREEQ    |
| <i>Oceanithermus desulfurans</i>        | [23] | QFSDVPAGHWAKEAVEKIAAE-GIILGFDPGTFRGNENLTRYQAAMI IYRLLQKLEPGQM  |
| <i>Meiothermus ruber</i>                | [24] | QFSDVPAGHWAKEAVEKIAAC-GLITGFDPGTFRGTNLTTRYQAALI IFRLLNEIQQGE   |
| <i>Thermus thermophilus</i>             | [24] | QFSDVPAGHWAKEAVEKIAAK-GIILGFDPGTFRGNENLTRYQAALI IYRLLQKLEPEELK |
| <i>Thermus thermophilus</i>             | [24] | QFSDVPAGHWAKEAVEKIAAK-GIILGFDPGTFRGNENLTRYQAALI IYRLLQKLEPEELK |
| <b>SlpA-like</b>                        |      |                                                                |
| <i>Deinococcus radiodurans</i>          | [36] | QFTDVPAGHWAKDAVDRLTQC-GLIQGFDPGTFRGNENLTRYQAALI FYRMLSTNALSTC  |
| <i>Deinococcus radiodurans</i>          | [45] | APVACTQGAWAKAAIDLVTK-GLFIGYDPDGSFDWCSAITRQEAQV LARLLAAMPENTF   |
| <i>Thermus thermophilus</i>             | [23] | --QDAPSPWAEAEVRILVAK-GVFIGYDPDGSFRWREPMTRQEAALALYRLLAAYGLDR    |
| <i>Armatimonas rosea</i>                | [24] | PFKDVNDHWAYQAI DKLAQL-KIIGDPDQGFHGKRTLTRYEMAVMLARLLQIQIEELK    |
| <i>Armatimonas rosea</i>                | [26] | APDDVPATHWAYPAVQDLISK-GLIQNFPNGKYLGERLTRYEMASLVKRLMDLYLAKTQV   |
| <i>Acetomicrobium mobile</i>            | [25] | PFVDVPMNHWAYDAISQLAAK-GIIQGYPDGTYRGNHPMTRYEMSMLVARALATVDMKA    |
| <i>Acetomicrobium mobile</i>            | [25] | PFVDVPMNHWAYDAISQLAAK-GIIQGYPDGTYRGNHPMTRYEMSMLVARALATVDMKA    |
| <i>Synechococcus</i> sp. PCC 7502       | [74] | QLSDVQPTDWAFTSLQSLVERYGCIAGYDPKTYRGRALSRYEFAAGLNACLDKVNELIS    |
| <i>Synechococcus</i> sp. PCC 7502       | [64] | QFSDVQPTDWAFTALQSLVERYGCIAGYDPDSTYRGRALSRYEFAAGLNACLDKINELIS   |
| <i>Synechococcus</i> sp. PCC 7502       | [55] | QLSDVQPTDWAFTALQSLVERYGCIAGYDPNPTYRGRALSRYEFAAGLNACLDKINELIS   |
| <i>Synechococcus</i> sp. PCC 7502       | [74] | QLSDVQPTDWAFTALQSLVERYGCIAGYDPNPTYRGRALSRYEFAAGLNACLDKINELIS   |
| <i>Synechococcus</i> sp. PCC 7502       | [56] | QLSDVQPTDWAFTSLQSLVERYGCIAGYDPNPTYRGRALSRYEFAAGLNACLDKINELIS   |
| <i>Synechococcus</i> sp. PCC 7502       | [50] | QLLDVQPTDWFVAVQSLVERYSCLEGYPSHKYFGTRVLSRYEFASGLNACINHNQLLT     |
| <i>Ca. Melainabacteria bacterium</i>    | [31] | NFADVPAEHWAAKAVTDLVEKYGVMAEFPDQTFKGRNISRYEAAAFYKMLDMSQVED      |
| <i>Ca. Saganbacteria bacterium</i>      | [23] | KFKDLPADHWAAKSVYSLVKM-GVTSGYPDGTFRGGKNI TRYETAIFLSKLADRLKDEVA  |
| <i>Chloroflexaceae bacterium</i>        | [67] | QLRDVNPGEWAFEARLSLVERYGCIIEGYPDQTFRGNRATTRYEFAAGLNACLSNIERLIA  |
| <i>Chloroflexaceae bacterium</i>        | [37] | QLRDVSPGEWAFEARLSLVERYGCIIEGYPDQTFRGNRATTRYEFAAGLNACLSNIERLIA  |
| <i>Chloroflexaceae bacterium</i>        | [81] | ELQDVSPSDWAFEARLSLVERYGCIIEGYPDRTYRGNRALTRYEFAAGLNACLSNIERLIA  |
| <i>Chloroflexaceae bacterium</i>        | [34] | QLRDVQPSDWAYALQLLIERYNCLTYGPDASFRGHRALTRYEFAAGLNACLDQVEGLVLR   |
| <i>Acetohalobium arabaticum</i>         | [25] | PFTDVPADHWAYDAI KEVSEA-GIVTGYEDGTFRGDEKLTRYEMAVIAARISSQVEEQA   |
| <i>Halanaerobium saccharolyticum</i>    | [24] | SFSDVPSDHWAYDAINKLVAA-GIVEGYPDGEFFKQSQMTRYEMAVMVSRALDKIADEQQ   |
| <i>Acidaminococcus fermentans</i>       | [24] | PFSDLPAGHWAYGAVAKLAAA-GVVDGYPDGTFKGDRTMTRYEMAQIVAKALAKGAI GAD  |
| <i>Acidaminococcus fermentans</i>       | [24] | PFSDLPAGHWAYGAVAKLAAA-GVVDGYPDGTFKGDRTMTRYEMAQIVAKALAKGAI GAD  |
| <i>Acidaminococcus fermentans</i>       | [24] | PFSDLPAGHWAYGAVAKLAAA-GVVDGYPDGTFKGDRTMTRYEMAQIVAKALAKGAI GAD  |
| <i>Acidaminococcus fermentans</i>       | [24] | PFSDLPAGHWAYGAVAKLAAA-GVVDGYPDGTFKGDRTMTRYEMAQIVAKALAKGAI GAD  |
| <i>Limnochorda pilosa</i>               | [28] | PFDPVDPDHWAESVELLRAA-GLVIGYDPGEYKGNRQLTRYEMAMIVSRVLVLDLDMVA    |
| <i>Cytophageales bacterium</i>          | [31] | PFADVPTDHWAYQSVDKLQKG-GIVIGYDPGTYGGKRAMTRYEFAVAIARLLEKIPQPD    |
| <i>Parabacteroides distasonis</i>       | [25] | PFSDVTPDSWAYQAVS QLAST-GIITGYPDGTFRGENGITRFQVAQMVAKALANQDRANA  |
| <i>Salmonella enterica</i> subsp.       | [25] | PFSDVPESSWAYQSVELASA-GIINGYPDGTFKGNKDI TRYEMAQMVAKAMANQDRANA   |
| <i>Salmonella enterica</i> subsp.       | [25] | PFSDVTPDSWAYQAVS QLAST-GIITGYPDGTFRGENGITRFQVAQMVAKALANQDRANA  |
| <b>OmpA</b>                             |      |                                                                |
| <i>Thermotoga maritima</i> (OmpA/OmpA1) | [21] | FFPDVPKDHWAYEYVVKLWQR-GIFIGYDPGEFFKGDRI TRYEAATAVSRLLDFIEQKML  |
| <i>Thermotoga maritima</i> (OmpA2)      | [20] | QFKDVPVNHWAYEAVMEMSKL-GVLTGMPDGTFFQGNLYLTRYQAALFYRLLNLIKQPSA   |
| <i>Thermotoga maritima</i> (OmpA3)      | [23] | NIKDLEPDSPF EAVNVVKA-GIMELDDKGNFRGALLVTRYDVAQYIYRLLVMRFELEKL   |
| <i>Fervidobacterium nodosum</i> (OmpA)  | [20] | AFRDI PKGWAKNYVERLEQI-GIVTGFDPGTYRGDEAVTRYQIALFISRTLLDQVEQSL   |

**B**

**Structure comparison of the SCWP-binding sites of SpaA and SlpA**

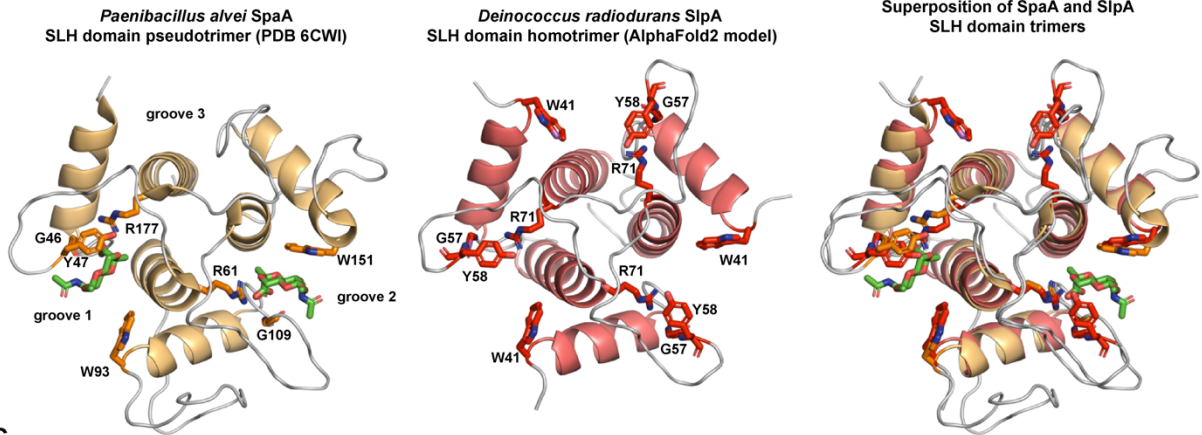

**C**

|                            |       |                                                     |       |                  |  |
|----------------------------|-------|-----------------------------------------------------|-------|------------------|--|
|                            |       | hhhhhhhhhhhh                                        |       | hhhhhhhhhhhhhhhh |  |
| <i>D. radiodurans</i> SlpA | [39]  | GHWAKDAIDRLVSRGVILGY--PDGT-FRGTQNLTRYEAII IARLLDQMR | [86]  |                  |  |
| <i>P. alvei</i> SpaA       | [28]  | AKTQEKFDALKEAGVFSGY--PGTTDAKLGQDMTRAEFAKVLVKLFGLKE  | [76]  |                  |  |
| <i>P. alvei</i> SpaA       | [91]  | KNWAAPFIEAVTAEGLMQKDLTKKI-FDFNGKI TVEEASKTLVTALKLEP | [140] |                  |  |
| <i>P. alvei</i> SpaA       | [149] | TDWAKGYFEAAVNAGLFSKD-----ANPKANATRAQLVEAAFAADEM     | [192] |                  |  |

**Figure S7. Sequence and structural comparisons of SLH domains from SlpA and SlpA-like proteins.**

(A) Residues important for binding PG-linked SCWPs are shown in boldface, and the start position of the SLH domain is indicated in brackets. Accession details for the shown sequences are provided in Table S2. (B) The S-layer protein SpaA of *Paenibacillus alvei* CCM 2015<sup>T</sup> contains three consecutive copies of the SLH domain in its N-terminal segment (4). These three domains form a pseudotrimer, similar to the homotrimer formed by the SLH domain of *D. radiodurans* SlpA. Side chains of the residues involved in SCWP-binding in grooves 1 and 2 of SpaA and the corresponding residues of SlpA are shown in stick representation. (C) A sequence alignment of the SLH domains of SpaA and SlpA is additionally shown. Residues involved in SCWP-binding in SpaA are colored red. The TRAE and GhxG (h=hydrophobic amino acid residue) motifs, which are highly conserved in SLH domains, are shown in boldface. Secondary structure ( $h=\alpha$ -helix) observed in the SLH domain of SlpA is marked.

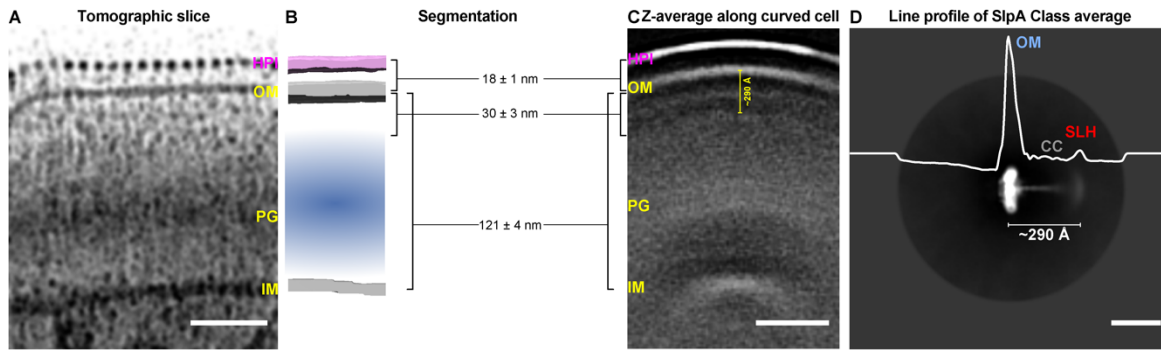

**Figure S8. Cryo-ET and cryo-EM of *D. radiodurans* cell envelopes.**

(A) Tomographic slice through the outer envelope of a partially lysed *D. radiodurans* cell. The cell envelope can be divided into four prominent regions, as listed from the extracellular space to the cytosol: A repetitive S-layer containing the HPI protein, the OM, a thick layer of PG, and the IM, which is in agreement with previous studies (5). (B) Segmentation of the tomographic volume. (C) Z-average of subtomograms extracted along the curved surface of *D. radiodurans* highlights the most prominent cell surface features of the complex envelope of *D. radiodurans*. A weak PG density appears,  $\sim 290$  Å away from the OM towards the interior of the cell (marked). (D) Line profile of 2D cryo-EM class average of SlpA with the same distance of the OMBB to the S-layer homology (SLH) domain (marked). Binding of the SlpA SLH domain to the *D. radiodurans* PG has been previously biochemically demonstrated (6). Scale bar: A,C: 500 Å D) 200 Å.



## Supplementary Tables

**Table S1: Cryo-EM data collection, refinement and validation statistics**

---

|  |               |
|--|---------------|
|  | #Drad_SlpA    |
|  | (EMD-15378)   |
|  | (PDB ID 8AE1) |

---

|                                                           |                  |
|-----------------------------------------------------------|------------------|
| <b>Data collection and processing</b>                     |                  |
| Microscope                                                | Titan Krios G3   |
| Magnification                                             | 81,000           |
| Voltage (kV)                                              | 300              |
| Total Electron exposure (e <sup>-</sup> /Å <sup>2</sup> ) | 47.909           |
| Detector                                                  | K3 (Gatan)       |
| Slit width (eV)                                           | 20               |
| Defocus range (μm)                                        | -1 to -2.5       |
| Acquisition Mode                                          | Super-resolution |
| Pixel size (Å)                                            | 0.546            |
| AFIS <sup>&amp;</sup> Mode                                | Yes              |
| Micrographs collected                                     | 2,294            |
| Micrographs used                                          | 2,294            |

  

|                                                  |                 |
|--------------------------------------------------|-----------------|
| <b>Data processing</b>                           |                 |
| Software reconstruction                          | RELION3.1 (2)   |
| Software picking                                 | TOPAZ (1)       |
| Initial particle images (no.)                    | 223,878         |
| Final particle images (no.)                      | 122,412         |
| Rescaled Box-size Class2D (px)                   | 128 x 128       |
| Rescaled Box-size Class3D (px)                   | 512 x 512 x 512 |
| Final Box-size (px)                              | 512 x 512 x 512 |
| Pixel size final reconstruction (Å)              | 1.092           |
| Symmetry imposed                                 | C3              |
| Map resolution (Å)                               | 3.25            |
| FSC threshold                                    | 0.143           |
| Map resolution range (Å)                         | 2.9 – 6.7       |
| Map sharpening <i>B</i> factor (Å <sup>2</sup> ) | -46.8126        |
| 3DFSC sphericity <sup>#</sup>                    | 0.985           |

  

|                               |      |
|-------------------------------|------|
| <b>Model Refinement</b>       |      |
| Initial model used (PDB code) | None |

---

---

|                                    |              |
|------------------------------------|--------------|
| Software                           | PHENIX (7)   |
| Model resolution (Å)               | 3.3          |
| FSC threshold                      | 0.5          |
| Model composition                  |              |
| Non-hydrogen atoms                 | 21,504       |
| Protein residues                   | 2,859        |
| Ions                               | 18           |
| <i>B</i> factors (Å <sup>2</sup> ) |              |
| Protein                            | 51.67        |
| Ligand                             | 58.42        |
| R.m.s. deviations                  |              |
| Bond lengths (Å)                   | 0.002        |
| Bond angles (°)                    | 0.472        |
| Validation                         |              |
| MolProbity score                   | 1.29         |
| Clashscore                         | 3.61         |
| Poor rotamers (%)                  | 0.00         |
| Cβ outliers (%)                    | 0.00         |
| CABLAM outliers (%)                | 2.14         |
| Ramachandran plot                  |              |
| Favored (%)                        | 97.27        |
| Allowed (%)                        | 2.73         |
| Disallowed (%)                     | 0.00         |
| Rama-Z (Z-score, RSMD)             |              |
| whole (N= 2853)                    | -1.01 (0.16) |
| helix (N= 183)                     | -0.65 (0.42) |
| sheet (N= 1236)                    | -0.39 (0.15) |
| loop (N= 1434)                     | -0.83 (0.16) |

---

& AFIS: Aberration Free Imaging Shift Mode.

# 3D-FSC sphericity as determined by the methods described in(3).

**Table S2: Accession information for SlpA and SlpA-like proteins; several bacteria contain multiple homologs.**

| Organism                                | NCBI/UniProt accession | Barrel size |
|-----------------------------------------|------------------------|-------------|
| <b>SlpA</b>                             |                        |             |
| <i>Deinococcus radiodurans</i>          | WP_010889202           | 30-stranded |
| <i>Deinococcus wulumuqiensis</i>        | WP_017871655           | 30-stranded |
| <i>Deinococcus wulumuqiensis</i>        | WP_114672325           | 30-stranded |
| <i>Deinococcus ficus</i>                | WP_191241882           | 28-stranded |
| <i>Deinobacterium chartae</i>           | WP_183988817           | 28-stranded |
| <i>Marinithermus hydrothermalis</i>     | WP_013702952           | 30-stranded |
| <i>Oceanithermus desulfurans</i>        | WP_147148761           | 30-stranded |
| <i>Meiothermus ruber</i>                | WP_013015232           | 28-stranded |
| <i>Thermus thermophilus</i>             | WP_011228992           | 28-stranded |
| <i>Thermus thermophilus</i>             | P35830                 | 28-stranded |
| <b>SlpA-like</b>                        |                        |             |
| <i>Deinococcus radiodurans</i>          | WP_010887767           | 8-stranded  |
| <i>Deinococcus radiodurans</i>          | WP_027480303           | 8-stranded  |
| <i>Thermus thermophilus</i>             | WP_011228967           | 8-stranded  |
| <i>Armatimonas rosea</i>                | WP_184200374           | 20-stranded |
| <i>Armatimonas rosea</i>                | WP_184200710           | 16-stranded |
| <i>Acetomicrobium mobile</i>            | WP_014807739           | 18-stranded |
| <i>Acetomicrobium mobile</i>            | WP_014806458           | 18-stranded |
| <i>Synechococcus</i> sp. PCC 7502       | WP_015167070           | 16-stranded |
| <i>Synechococcus</i> sp. PCC 7502       | WP_015168280           | 16-stranded |
| <i>Synechococcus</i> sp. PCC 7502       | WP_015168863           | 16-stranded |
| <i>Synechococcus</i> sp. PCC 7502       | WP_015168481           | 16-stranded |
| <i>Synechococcus</i> sp. PCC 7502       | WP_041429169           | 16-stranded |
| <i>Synechococcus</i> sp. PCC 7502       | AFY74914               | 16-stranded |
| Ca. <i>Melainabacteria</i> bacterium    | PKL78650               | 18-stranded |
| Ca. <i>Saganbacteria</i> bacterium      | MBI5699473             | 18-stranded |
| <i>Chloroflexaceae</i> bacterium        | NJL83094               | 16-stranded |
| <i>Chloroflexaceae</i> bacterium        | NJL82168               | 16-stranded |
| <i>Chloroflexaceae</i> bacterium        | NJL82038               | 16-stranded |
| <i>Chloroflexaceae</i> bacterium        | NJL82082               | 16-stranded |
| <i>Acetohalobium arabaticum</i>         | WP_013279101           | 24-stranded |
| <i>Halanaerobium saccharolyticum</i>    | WP_133516444           | 22-stranded |
| <i>Acidaminococcus fermentans</i>       | WP_106787916           | 16-stranded |
| <i>Acidaminococcus fermentans</i>       | WP_012939007           | 16-stranded |
| <i>Acidaminococcus fermentans</i>       | WP_012939010           | 16-stranded |
| <i>Acidaminococcus fermentans</i>       | WP_012939008           | 16-stranded |
| <i>Acidaminococcus fermentans</i>       | WP_012939009           | 16-stranded |
| <i>Limnochorda pilosa</i>               | WP_068139859           | 14-stranded |
| <i>Cytophagales</i> bacterium           | MBC8103537             | 20-stranded |
| <i>Parabacteroides distasonis</i>       | WP_172733356           | 16-stranded |
| <i>Salmonella enterica</i> subsp.       | EBY4570518             | 16-stranded |
| <i>Salmonella enterica</i> subsp.       | EBY4570338             | 16-stranded |
| <b>Ompα and Ompβ</b>                    |                        |             |
| <i>Thermotoga maritima</i> (Ompα/OmpA1) | Q01969                 | -           |
| <i>Thermotoga maritima</i> (OmpA2)      | Q9X252                 | -           |
| <i>Thermotoga maritima</i> (OmpA3)      | Q9WZH0                 | -           |
| <i>Thermotoga maritima</i> (Ompβ)       | WP_004081490           | 22-stranded |
| <i>Fervidobacterium nodosum</i> (Ompα)  | ABS61559               | -           |
| <i>Fervidobacterium nodosum</i> (Ompβ)  | ABS61560               | 24-stranded |

**Table S3. OMBB proteins in *D. radiodurans*; proteins for which we are unsure about the number of  $\beta$ -strands are indicated by (?).**

| <b>NCBI accession</b> | <b>Barrel size</b> | <b>Remarks</b>                                                       |
|-----------------------|--------------------|----------------------------------------------------------------------|
| Q9RRB6                | 30-stranded        | SlpA                                                                 |
| AAF11946              | 38-stranded        | Contains N-terminal immunoglobulin-like (invasin D3) domains         |
| UID71982              | 38-stranded        | Contains N-terminal immunoglobulin-like (invasin D3) domains         |
| UID69687              | 38-stranded        | Contains N-terminal immunoglobulin-like (invasin D3) domains         |
| AAF11400              | 8-stranded         | No additional domains                                                |
| ANC71147              | 8-stranded         | Contains a C-terminal domain with a cystatitin-like (NFT2-like) fold |
| ANC71478              | 18-stranded        | No additional domains                                                |
| AAF10759              | 8-stranded         | No additional domains                                                |
| AAF10697              | 8-stranded         | SlpA-type                                                            |
| AAF10549              | 8-stranded         | No additional domains                                                |
| UID69670              | 8-stranded         | No additional domains                                                |
| AAF10255              | 8-stranded         | No additional domains                                                |
| AAF10153              | 38-stranded (?)    | LPS-assembly protein LptD                                            |
| AAF09960              | 16-stranded        | Outer membrane assembly factor BamA                                  |
| ANC72597              | 8-stranded         | SlpA-type                                                            |
| QIP33551              | 24-stranded        | PapC usher                                                           |
| ANC70518              | 12-stranded (?)    | No additional domains                                                |
| AAF09880              | 12-stranded (?)    | No additional domains                                                |
| AAF11062              | 8-stranded         | No additional domains                                                |
| AAF10975              | 8-stranded         | No additional domains                                                |

## Supplementary Movie Legend

### Movie S1. Cryo-EM reconstruction of SlpA from *D. radiodurans*

The 3.25 Å (global) resolution cryo-EM reconstruction is shown with the atomic model (ribbon diagram) built into the density (isosurface). Resolution of the OMBB core is 2.9 Å (see Figure S1).

## Supplementary References

1. T. Bepler *et al.*, Positive-unlabeled convolutional neural networks for particle picking in cryo-electron micrographs. *Nat Methods* **16**, 1153-1160 (2019).
2. J. Zivanov, T. Nakane, S. H. W. Scheres, Estimation of high-order aberrations and anisotropic magnification from cryo-EM data sets in RELION-3.1. *IUCrJ* **7**, 253-267 (2020).
3. Y. Z. Tan *et al.*, Addressing preferred specimen orientation in single-particle cryo-EM through tilting. *Nat Methods* **14**, 793-796 (2017).
4. R. J. Blackler *et al.*, Structural basis of cell wall anchoring by SLH domains in *Paenibacillus alvei*. *Nat Commun* **9**, 3120 (2018).
5. D. L. Sexton, S. Burgold, A. Schertel, E. I. Tocheva, Super-resolution confocal cryo-CLEM with cryo-FIB milling for in situ imaging of *Deinococcus radiodurans*. *Current Research in Structural Biology* **4**, 1-9 (2022).
6. C. S. Misra, B. Basu, S. K. Apte, Surface (S)-layer proteins of *Deinococcus radiodurans* and their utility as vehicles for surface localization of functional proteins. *Biochim Biophys Acta* **1848**, 3181-3187 (2015).
7. D. Liebschner *et al.*, Macromolecular structure determination using X-rays, neutrons and electrons: recent developments in Phenix. *Acta Crystallogr D Struct Biol* **75**, 861-877 (2019).
